# Supplementary material for: Determination of the vRNA and cRNA promoter activity by M segment-specific non-coding nucleotides of influenza A virus
Source: PubMed Central journal article supplement — RNA Biol. 2020 Dec 23;18(5):785–95. doi: 10.1080/15476286.2020.1864182 (PMC8078515; doi:10.1080/15476286.2020.1864182), 2020-12-23
Supplement: KRNB_A_1864182_SM1833.pdf [file KRNB_A_1864182_SM1833.pdf]

## Supporting Information

### Determination of the vRNA and cRNA promoter activity by M segment-specific non-coding nucleotides of influenza A virus

by H. Shin *et al.*

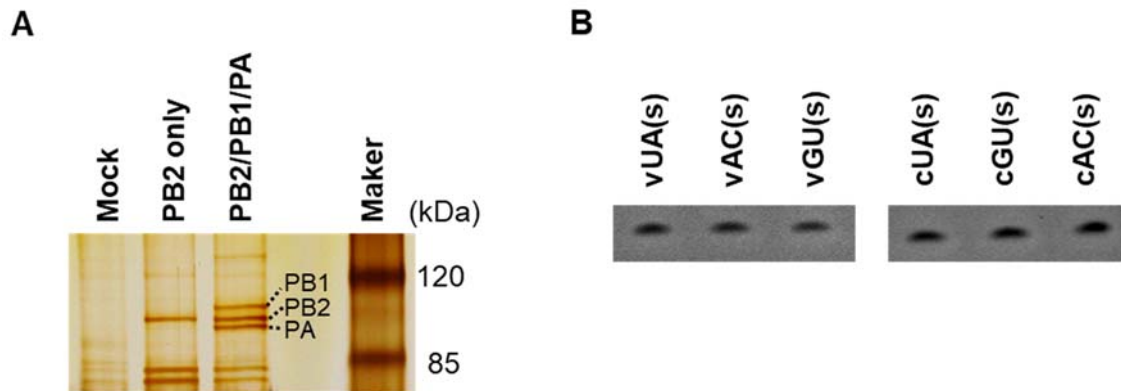

**Figure S1. Characterization of purified influenza viral polymerase complex and the synthetic RNA promoters.** (A) Silver staining of the purified viral proteins. *In vitro* assembled trimeric PB2-CBP/PB1/PA complex was purified using IgG Sepharose after co-transfection of 293T cells with three plasmids expressing PB2-TAP, PB1 and PA. Mock, no transfected; PB2 only, transfected with the PB2-TAP-expressing plasmid alone; PB2/PB1/PA, transfected with the three different plasmids. Marker sizes are indicated in kDa. (B) The synthetic RNA promoters were electrophoresized on denaturing urea PAGE (20%) and detected by staining with fluorescent nucleic acid dye, GelRed™ (Biotium).

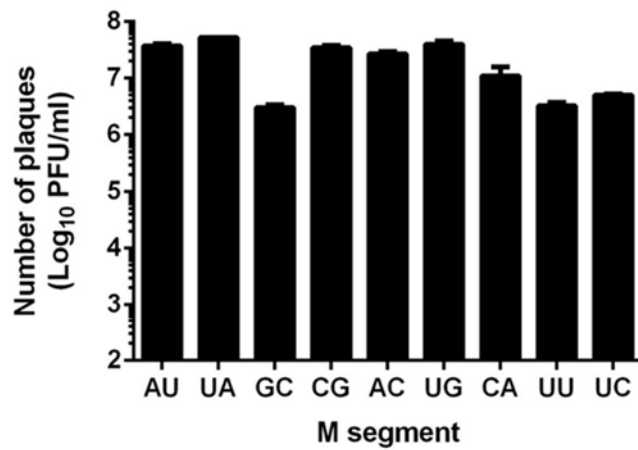

**Figure S2. Plaque titration of the recombinant viruses of passage 2 (P2).** Recombinant viruses of P1 were infected into MDCK cells for 2 days at an MOI of  $10^{-4}$  [exceptionally  $5 \times 10^{-6}$  for M(UG)]. The number of infectious viral particles (P2) in culture supernatants was quantified by plaque assay and expressed as means  $\pm$  SEM ( $\log_{10}$  PFU/ml) from an experiment in triplicate.

**A**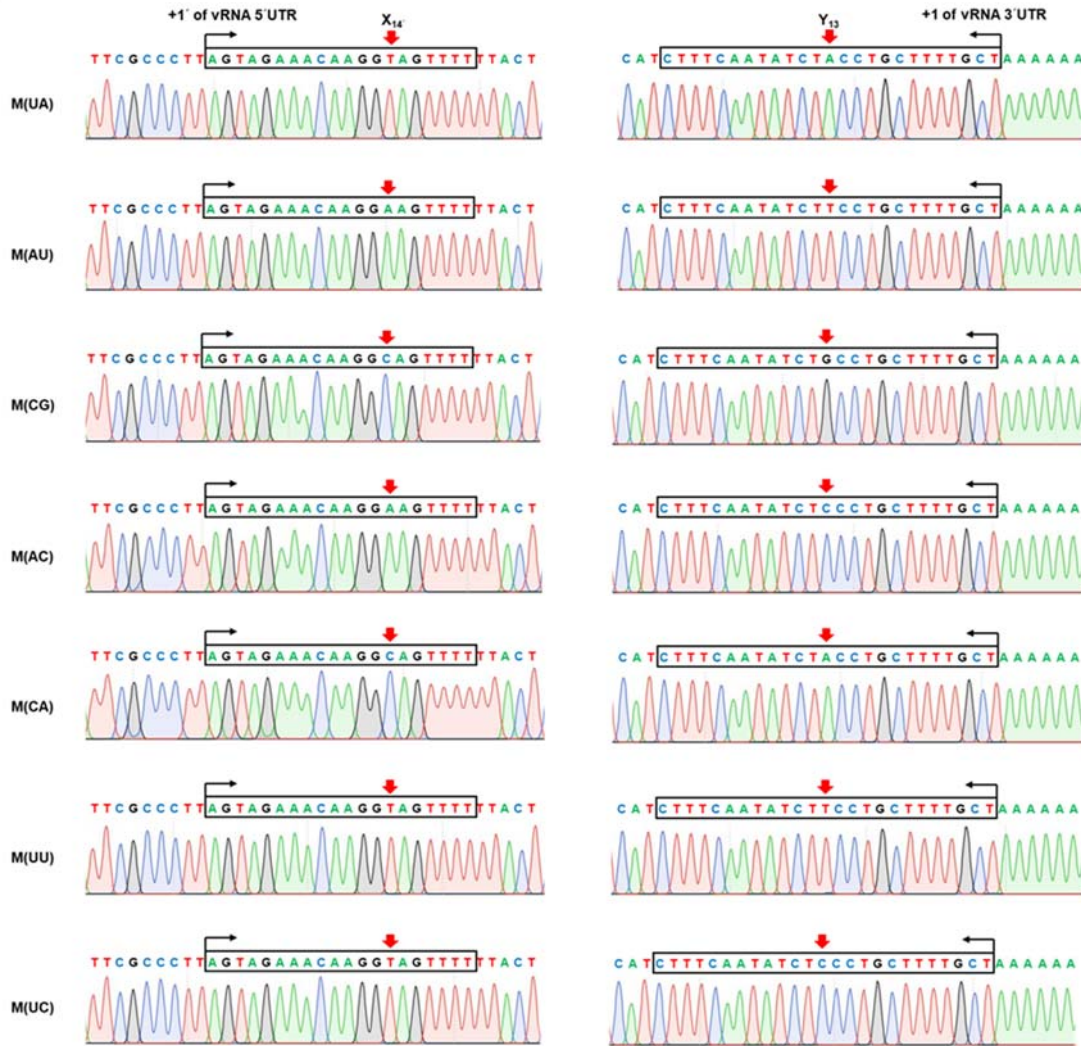**B**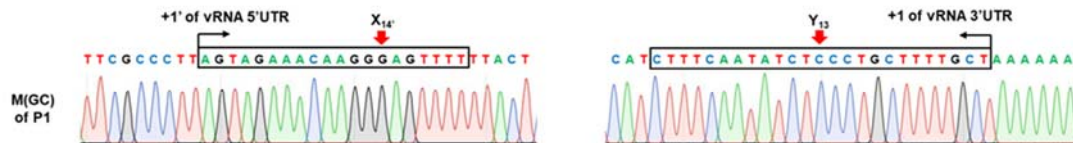

**Figure S3. Determination of 5' and 3' UTR sequences of the wild-type [M(UA)] and mutant M segments.** Terminal nucleotides were identified by 5' (left) and 3' (right) RACE with vRNAs of P2 (A) or P1 (B) viruses. Noncoding regions of the M segments are marked in boxes and terminal ends with black arrows. Thick red arrows point the target sequences, X<sub>14</sub>' and Y<sub>13</sub>, of the vRNAs. Recombinant viruses are designated at the left side of chromatograms.

## Supplementary Tables

**Table S1. Primers for cloning the reporter plasmids**

| Oligonucleotide     | Sequence (5' to 3') <sup>a</sup>                                                     | Use                                         |
|---------------------|--------------------------------------------------------------------------------------|---------------------------------------------|
| vRNA(EGFP)<br>(fwd) | <i>ATATCGTCTCGTATTAGTAGAAACAAGGTAGTTTTT</i><br><u><b>ACTTGTACAGCTCGTCCATGC</b></u>   | Amplification of<br>vRNA(EGFP) <sup>b</sup> |
| vRNA(EGFP)<br>(rev) | <i>TATTCGTCTCAGGGAGCAAAAGCAGGTAGATATTGA</i><br><u><b>AAGATCGTGAGCAAGGGCGAGGA</b></u> |                                             |
| cRNA(EGFP)<br>(fwd) | <i>ATCGTCTCGTATTAGCAAAAGCAGGTAGATATTG</i>                                            | Amplification of<br>cRNA(EGFP) <sup>c</sup> |
| cRNA(EGFP)<br>(rev) | <i>TACGTCTCAGGGAGTAGAAACAAGGTAGTTTT</i>                                              |                                             |

<sup>a</sup>*Bsm*BI sites in italic; M segment-derived 5' and 3' UTRs in bold; start and stop codons in red; EGFP coding sequences underlined.

<sup>b</sup>For PCR amplification of vRNA(EGFP) or vUA, pEGFP<sub>Luc</sub> (BD Biosciences) was used as a template.

<sup>c</sup>For PCR amplification of cRNA(EGFP) or cUA, pHH21-EGFP-vM was used as a template.

**Table S2. Oligonucleotides designed for site-directed mutagenesis**

| Oligonucleotide       | Sequence (5' to 3') <sup>a</sup>      | Use                                                                                             |
|-----------------------|---------------------------------------|-------------------------------------------------------------------------------------------------|
| A <sub>14</sub> (fwd) | AGTAGAAACAAGGAAGTTTTTTA               | Mutation of U to A at nt 14' of 5' UTR of the M vRNA or A to U at nt 14 of 3' UTR of the M cRNA |
| A <sub>14</sub> (rev) | TAAAAAACTTCCTTGTTTCTACT               |                                                                                                 |
| G <sub>14</sub> (fwd) | AGTAGAAACAAGGGAGTTTTTTA               | Mutation of U to G at nt 14' of 5' UTR of the M vRNA or A to C at nt 14 of 3' UTR of the M cRNA |
| G <sub>14</sub> (rev) | TAAAAAACTCCCTTGTTTCTACT               |                                                                                                 |
| C <sub>14</sub> (fwd) | AGTAGAAACAAGGCAGTTTTTTA               | Mutation of U to C at nt 14' of 5' UTR of the M vRNA or A to G at nt 14 of 3' UTR of the M cRNA |
| C <sub>14</sub> (rev) | TAAAAAACTGCCTTGTTTCTACT               |                                                                                                 |
| U <sub>13</sub> (fwd) | CATCTTTCAATATCT <b>TC</b> CTGCTTTTGCT | Mutation of A to U at nt 13 of 3' UTR of the M vRNA or U to A at nt 13' of 5' UTR of the M cRNA |
| U <sub>13</sub> (rev) | AGCAAAAAGCAGGAAGATATTGAAAGATG         |                                                                                                 |
| G <sub>13</sub> (fwd) | CATCTTTCAATATCT <b>GC</b> CTGCTTTTGCT | Mutation of A to G at nt 13 of 3' UTR of the M vRNA or U to C at nt 13' of 5' UTR of the M cRNA |
| G <sub>13</sub> (rev) | AGCAAAAAGCAGGCAGATATTGAAAGATG         |                                                                                                 |
| C <sub>13</sub> (fwd) | CATCTTTCAATATCT <b>CC</b> CTGCTTTTGCT | Mutation of A to C at nt 13 of 3' UTR of the M vRNA or U to G at nt 13' of 5' UTR of the M cRNA |
| C <sub>13</sub> (rev) | AGCAAAAAGCAGGGAGATATTGAAAGATG         |                                                                                                 |

<sup>a</sup>Mutation sites are highlighted in bold.

**Table S3. Oligonucleotides for 5' and 3' RACE of the M segment**

| Oligonucleotide     | Sequence (5' to 3')                                            | Use                                                               |
|---------------------|----------------------------------------------------------------|-------------------------------------------------------------------|
| TSO                 | ACACTCTTTCCCTACACGACGCTCTTCCGA<br>TCTrGrGrG                    | Template switching<br>oligonucleotide for 5' RACE                 |
| M5RACE-<br>out(fwd) | CCGTCAGGCCCCCT                                                 | cDNA synthesis and nested<br>PCR of M segment cDNA                |
| TSO-out             | AATGATACGGCGACCACCGAGATCTACACTCTTT<br>CCCTACACGACGCTCTTCCGATCT | (outer primer set) for 5'<br>RACE                                 |
| M5RACE-<br>in(fwd)  | AGTAGAAACAAGG                                                  | Nested PCR of M segment<br>cDNA (inner primer set) for<br>5' RACE |
| M5RACE-<br>in(rev)  | CAAGCAGCAGAGGCCATGGA                                           |                                                                   |
| M3RACE dT           | GTGGTATCAACGCAGAGTTTTTTTTTTTTTTTTTT                            | cDNA synthesis for 3' RACE                                        |
| M3RACE-<br>out(fwd) | GACCAGCACTGGAGCTAGGA                                           | Nested PCR of M segment<br>cDNA (outer primer) for 3'<br>RACE     |
| M3RACE(rev)         | GTGGTATCAACGCAGAG                                              | Nested PCR of M segment<br>cDNA for 3' RACE                       |
| M3RACE-<br>in(fwd)  | TTCCTATACAGTTTAACTGC                                           | Nested PCR of M segment<br>cDNA (inner primer) for 3'<br>RACE     |
